# Supplementary material for: Spontaneously Resolved Atopic Dermatitis Shows Melanocyte and Immune Cell Activation Distinct From Healthy Control Skin
Source: PubMed Central journal article supplement (PMC7943477; doi:10.3389/fimmu.2021.630892), 2021-02-24

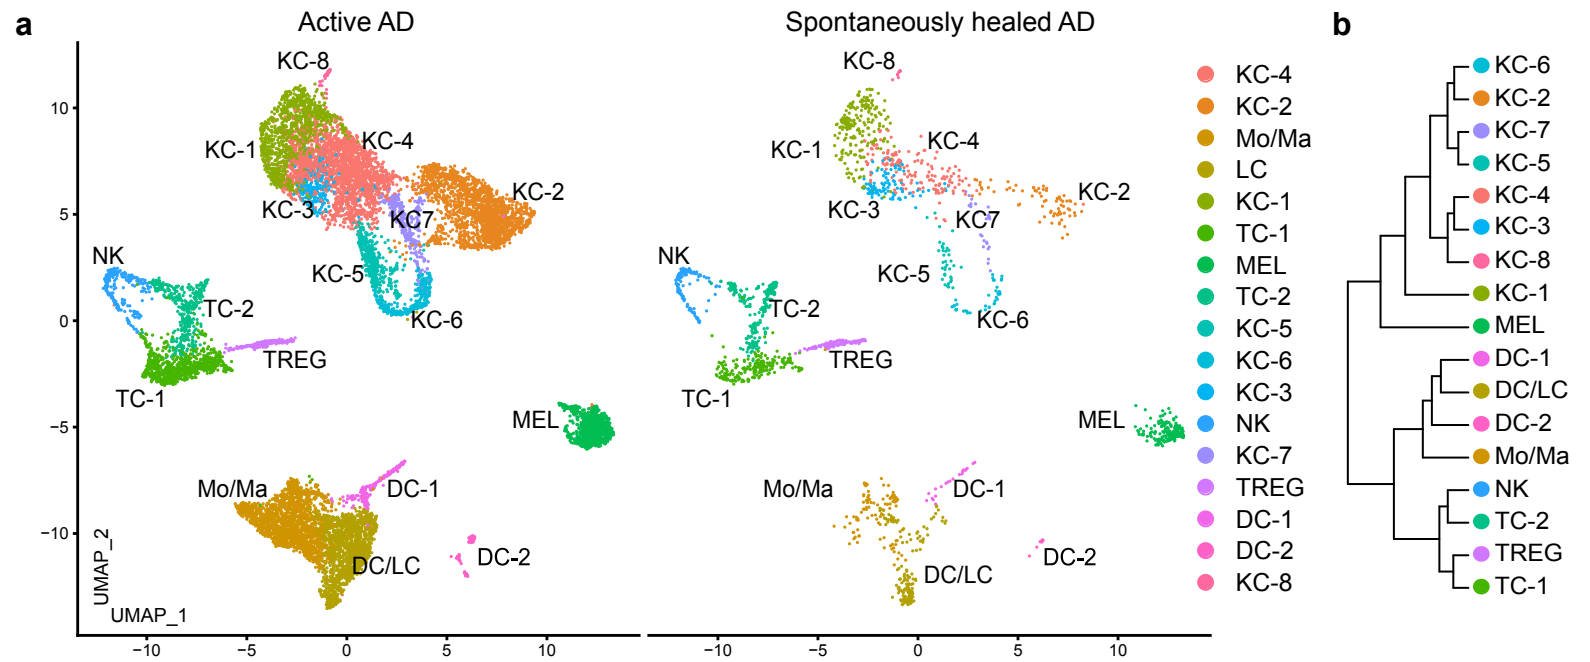

**c**      Top downregulated DEGs in spontaneously healed AD vs active AD

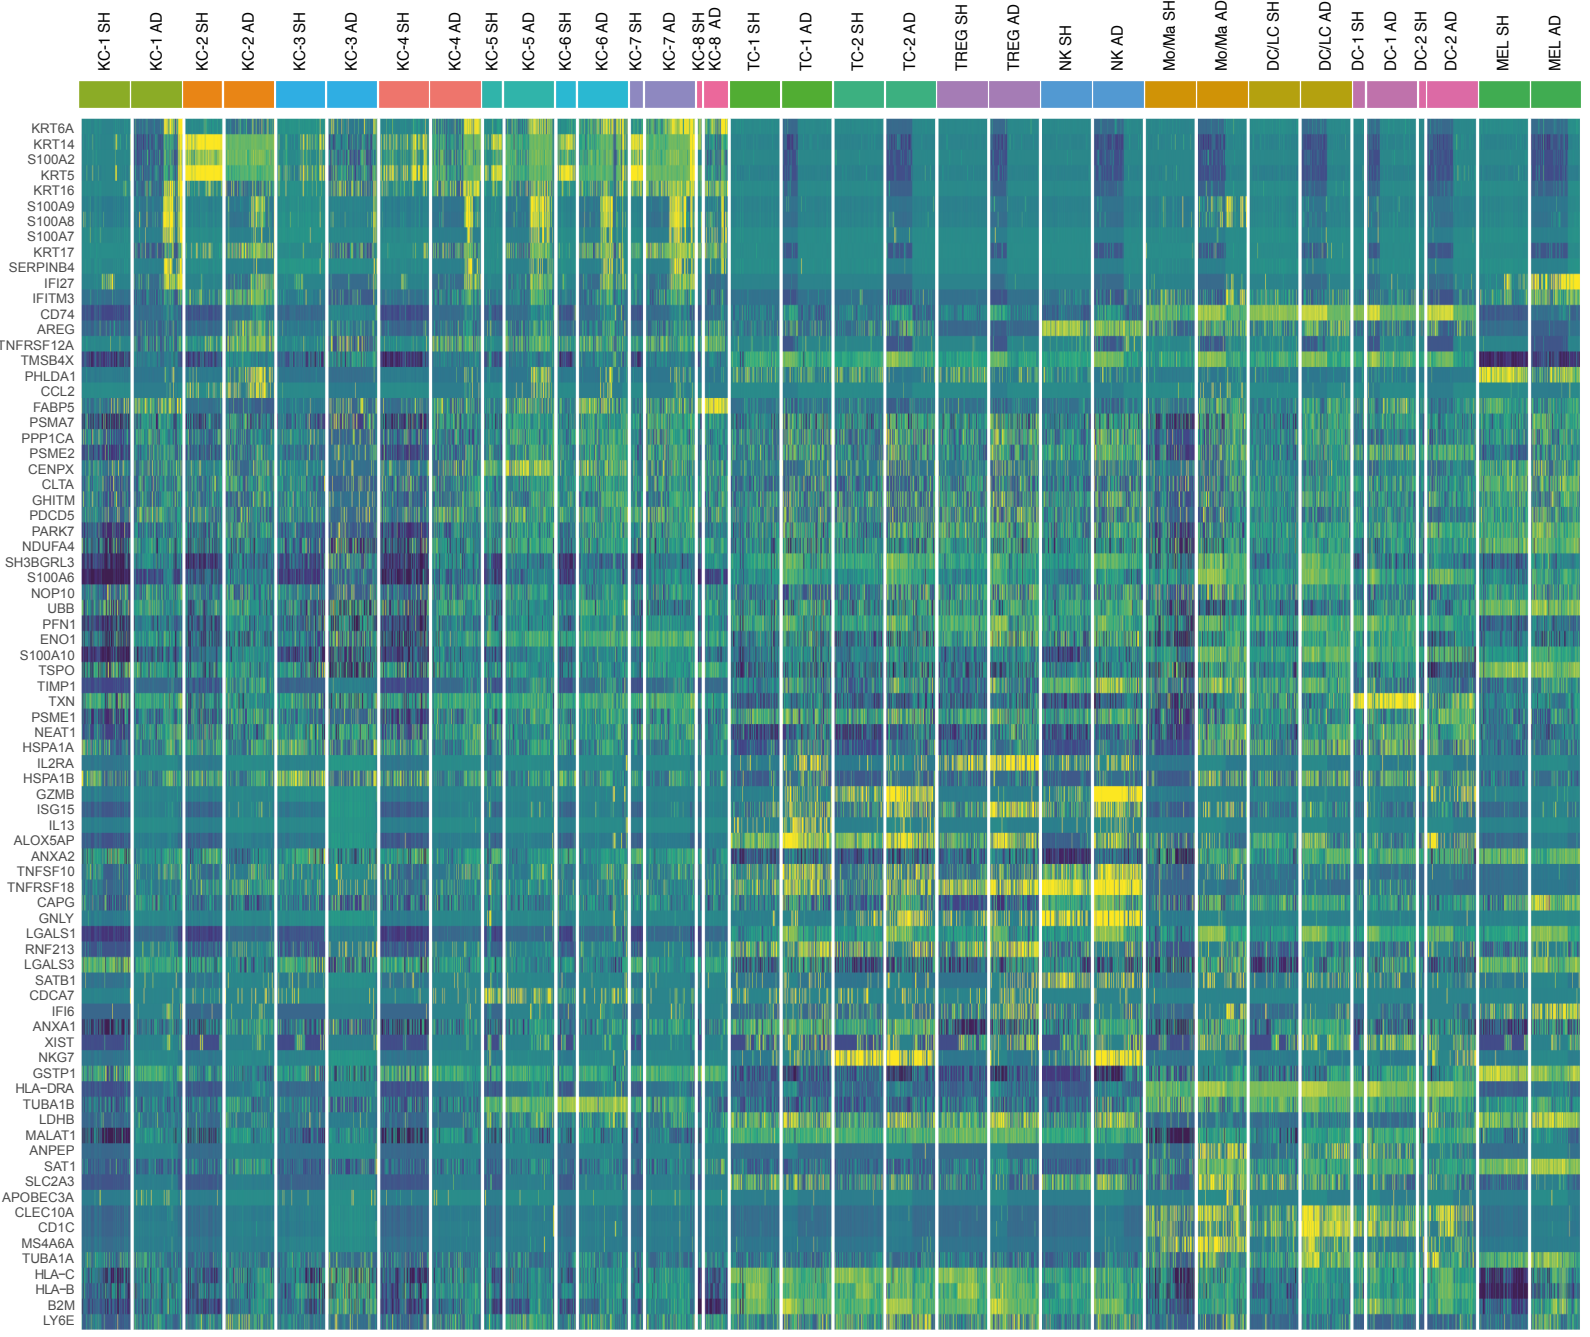

Supplement: Image_3.pdf [file Image_3.pdf]
